# Supplementary material
Source: Springer Nature journal article supplement (https://www.springermedizin.de/resource/supplementary/12990_2010_315_MOESM1_ESM.pdf/9613014)

A

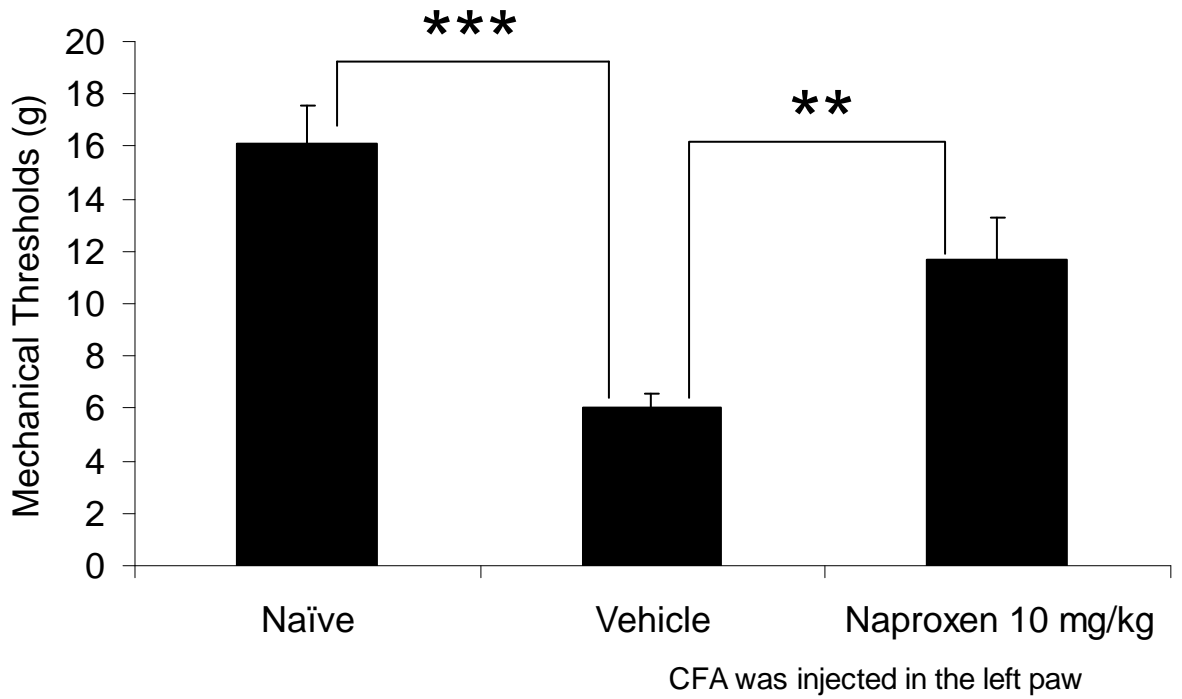

B

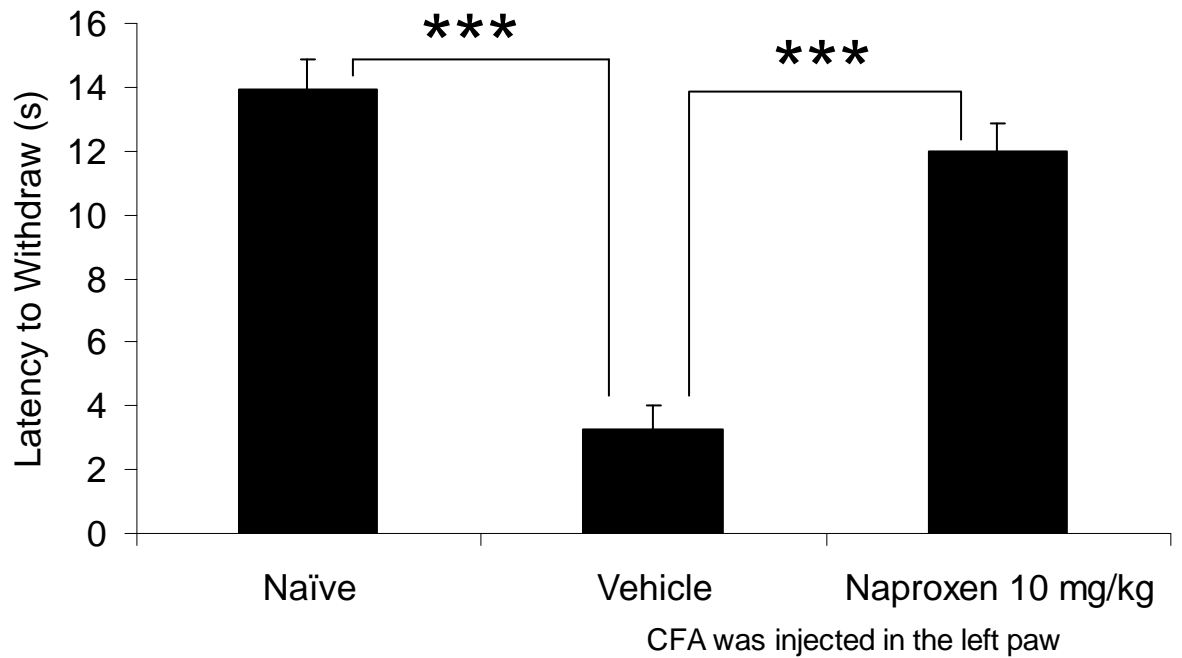

Supplement: MOESM1 [file 9613014]
